# Supplementary material for: Living cell imaging and sensing of hydrogen sulfide using high-efficiency fluorescent Cu-doped carbon quantum dots
Source: Royal Society of Chemistry journal article supplement (doi:10.1039/c8nj03654c), 2018-01-01
Supplement: c8nj03654c1.pdf [file c8nj03654c1.pdf]

## Electronic Supplementary Information

### Living cells imaging and sensing for hydrogen sulfide by a high-efficiency fluorescent Cu-doped carbon quantum dots

Shujuan Zhuo,<sup>\*ab</sup> Lingling Gao,<sup>c</sup> Ping Zhang,<sup>a</sup> Jinyan Du<sup>a</sup> and Changqing Zhu<sup>\*a</sup>

<sup>a</sup>Key Laboratory of Functional Molecular Solids, Ministry of Education; Anhui Key Laboratory of Chemo-Biosensing, College of Chemistry and Materials Science, Anhui Normal University, Wuhu, 241000, PR China

<sup>b</sup>Anhui Meijia New Materials Company Limited, Wuhu, 241000, PR China

<sup>c</sup>Anhui Xuancheng Product Quality Supervision and Inspection Institute, Xuancheng, 242000, PR China

\*Corresponding authors, E-mail addresses: sjzhuo@mail.ahnu.edu.cn (S. Zhuo), zhucq@mail.ahnu.edu.cn (C. Zhu).

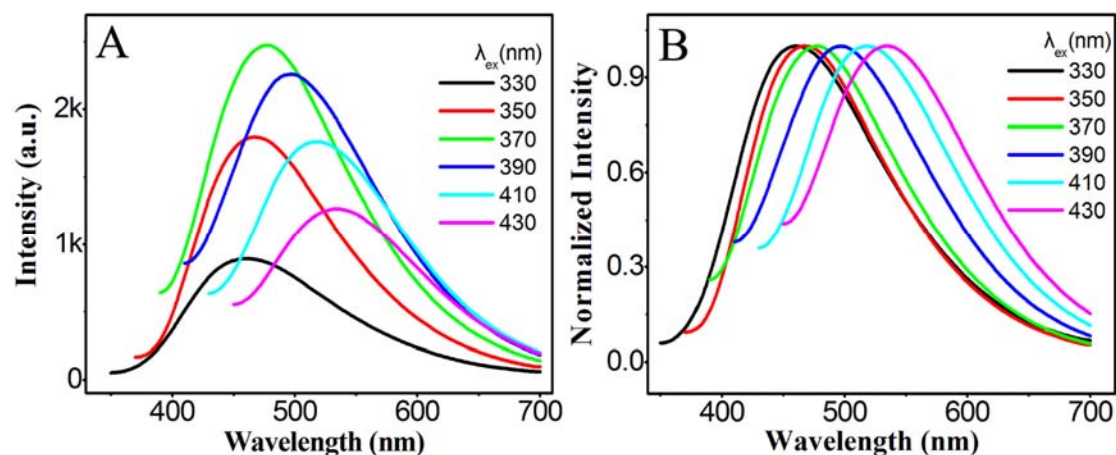

**Fig. S1** (A) Fluorescence spectra of the Cu-CQDs at different excitation wavelengths. (B) The corresponding normalized fluorescence spectra.

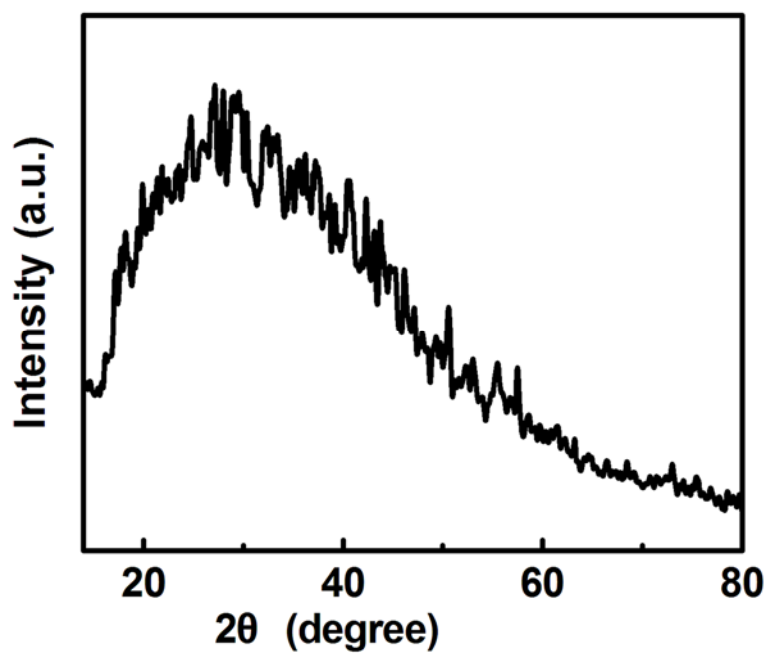

**Fig. S2** XRD pattern of as-prepared Cu-CQDs.

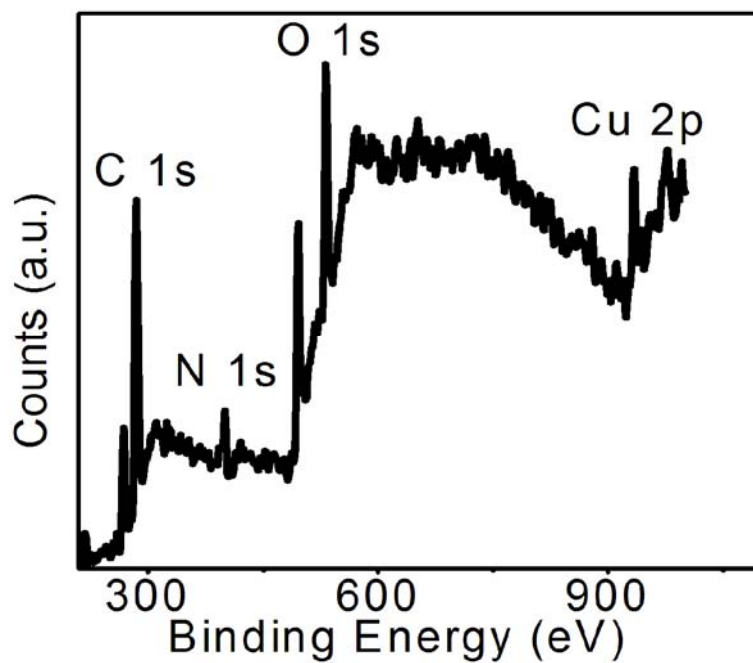

**Fig. S3** Wide scan XPS full spectrum of Cu-CQDs.

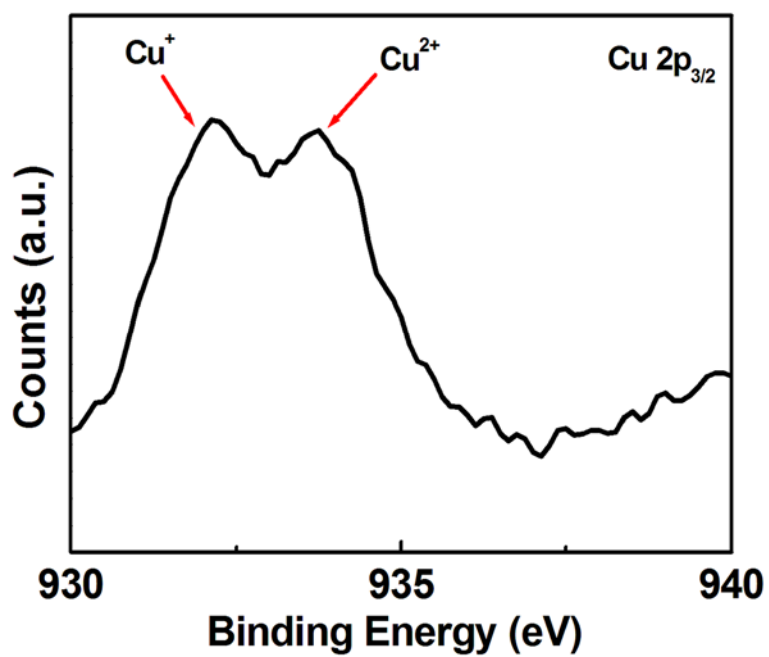

Fig. S4 High-resolution XPS spectrum of Cu 2p<sub>3/2</sub>.

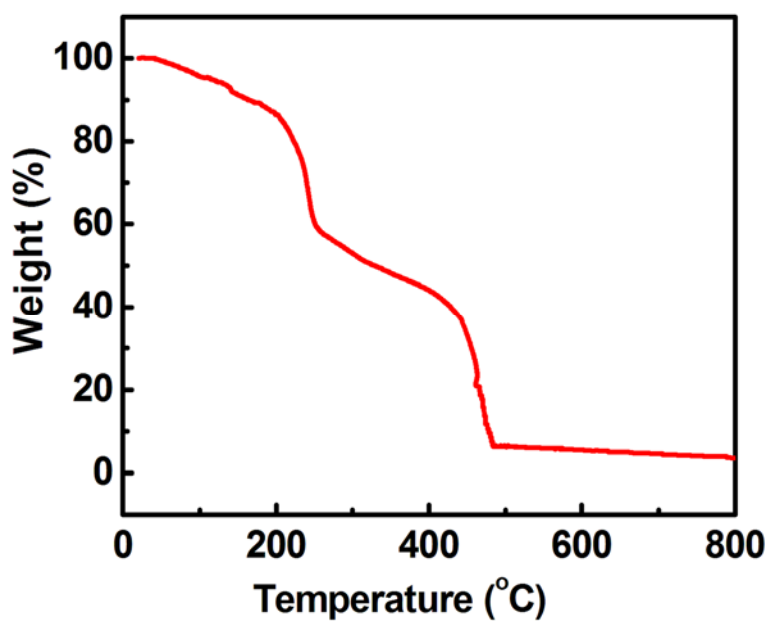

Fig. S5 TGA curve of as-prepared Cu-CQDs.

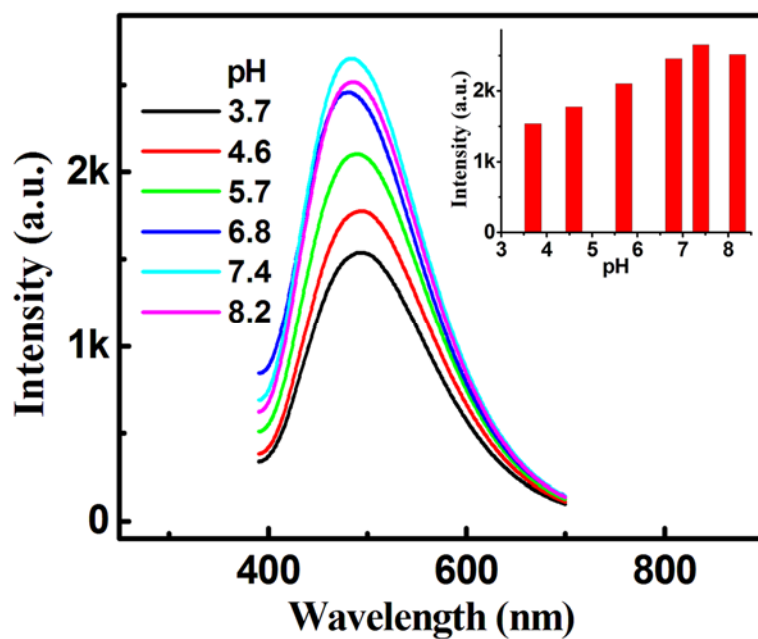

**Fig. S6** The effect of pH on the fluorescence intensity of Cu-CQDs.

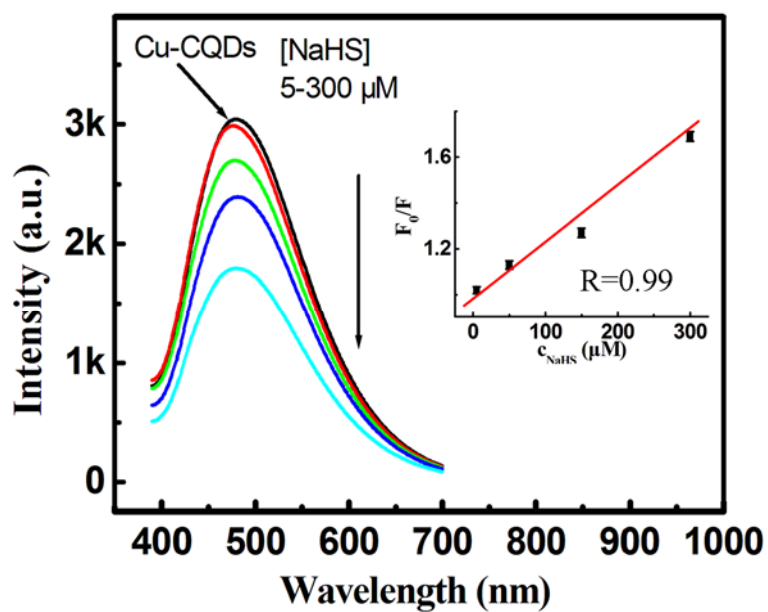

**Fig. S7** Fluorescence response and linear plot of Cu-CQDs probe with increment of NaHS in presence of human blood serum.

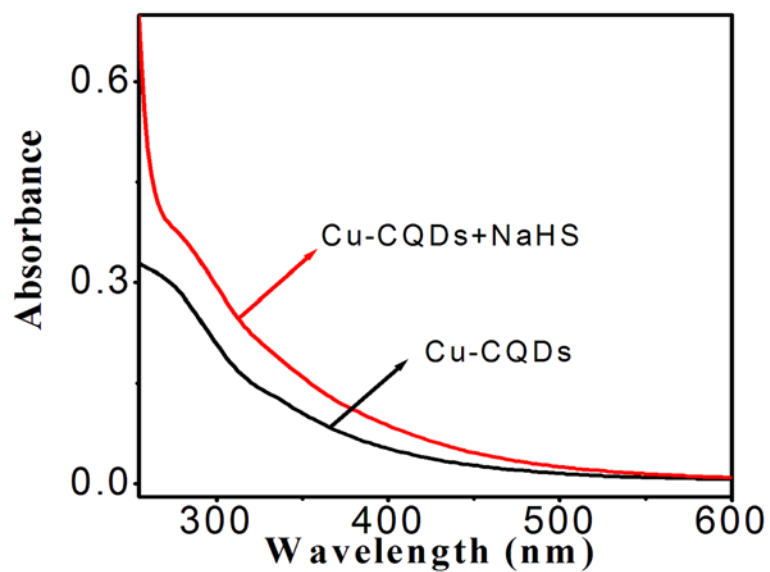

Fig. S8 UV-vis absorption spectra of Cu-CQDs in the absence and presence of NaHS.

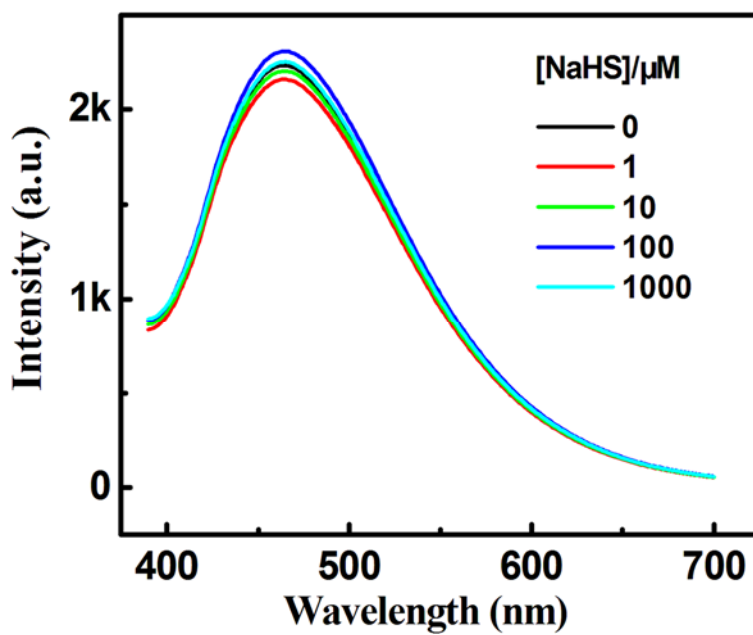

Fig. S9 Fluorescence response of bare CQDs toward NaHS.

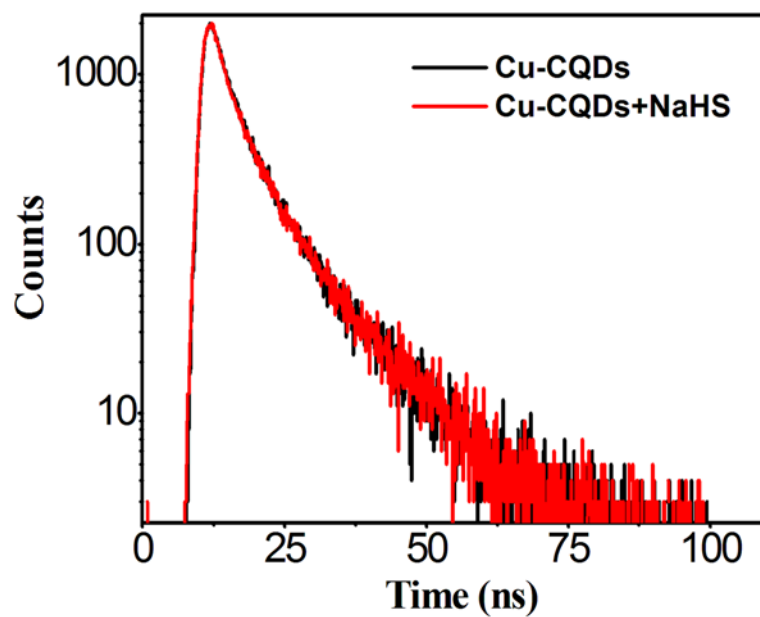

**Fig. S10** The fluorescence lifetimes of Cu-CQDs (black line) and Cu-CQDs+NaHS (red line).

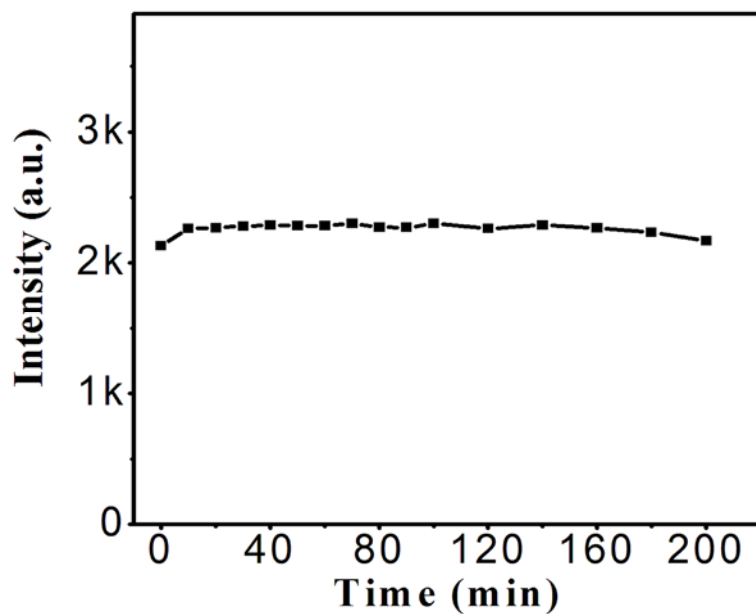

**Fig. S11** Time scan of Cu-CQDs measured by fluorescence spectrophotometer upon illumination at 365 nm UV light.

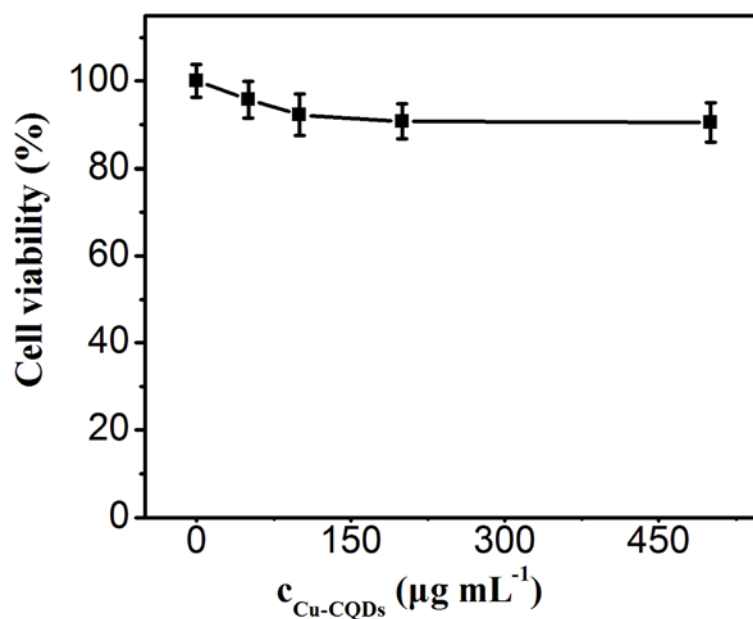

**Fig. S12** Cells viability (%) obtained by MTT assay. Lung cancer cells were incubated with Cu-CQDs at the concentration of 0, 50, 100, 200 and 500  $\mu\text{g mL}^{-1}$  for 24 h. The error bars represent the standard deviation of three measurements.

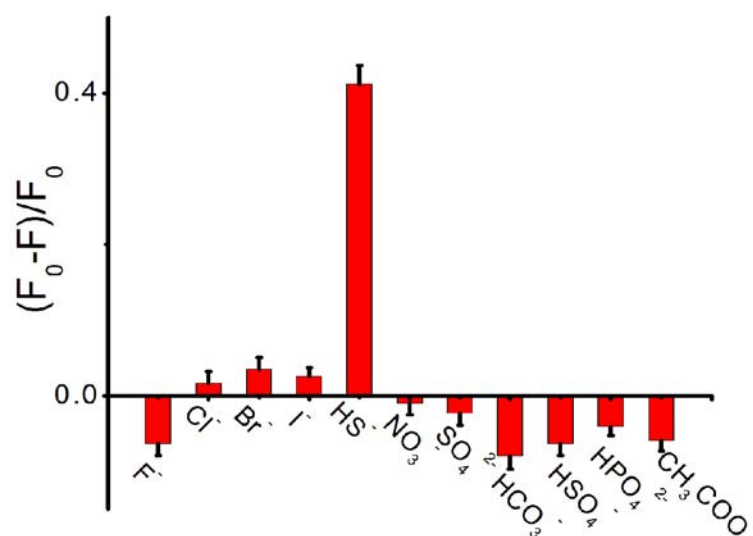

**Fig. S13** Cu-CQDs based system toward various potential interfering substances. The concentrations of all anions are 1 mM.  $F_0$  and  $F$  are fluorescent intensities of the Cu-CQDs before and after adding the corresponding substances, respectively. The error bars represent the standard deviation of three measurements.

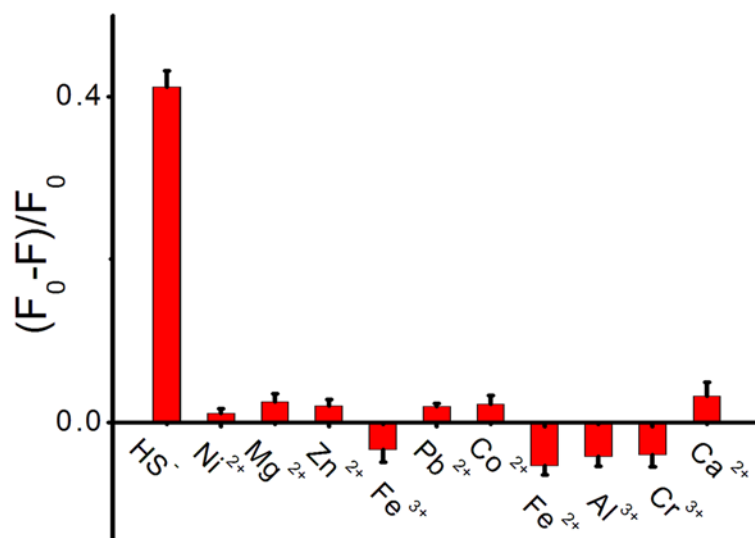

**Fig. S14** Cu-CQDs based system toward various metal ions. The concentrations of all tested substances are 1 mM.  $F_0$  and  $F$  are fluorescent intensities of the Cu-CQDs before and after adding the corresponding substances, respectively. The error bars represent the standard deviation of three measurements.

**Table S1** Comparison of analytical parameters between present probe and some other fluorescent probe for the sensing of  $\text{HS}^-$ .

| Probe system                          | Linear range ( $\mu\text{M}$ ) | Detection limit (nM) | Refs.     |
|---------------------------------------|--------------------------------|----------------------|-----------|
| DCM-PBA                               | 0-10                           | 1.1                  | 1         |
| NIR                                   | 0-200                          | 270                  | 2         |
| Lyso-Nap                              | 1-100                          | 330                  | 3         |
| DUT-52-( $\text{NO}_2$ ) <sub>2</sub> | 100-700                        | 20000                | 4         |
| Red-emitting                          | 1-7                            | 90                   | 5         |
| Ratiometric                           | 0-100                          | 2400                 | 6         |
| DPP- $\text{NO}_2$                    | 0-30                           | 5.2                  | 7         |
| MOF                                   | 0-100                          | 16                   | 8         |
| Metal complex                         | 30-90                          | 2240                 | 9         |
| Two-photon                            | 0-5                            | 20                   | 10        |
| Cu-CQDs                               | 2-500                          | 500                  | This work |

#### References

- 1 J.X. Men, X.J. Yang, H.B. Zhang and J.P. Zhou, *Dyes Pigments*, 2018, **153**, 206–212.
- 2 J.C. Xiong, L.L. Xia, Q.L. Huang, J.X. Huang, Y.Q. Gu and P. Wang, *Talanta*, 2018, **184**, 109–114.
- 3 O.Y. Juan, W.L. Jiang., K.Y. Tan, H.W. Liu, S.J. Li, J. Liu, Y.F. Li and C.Y. Li, *Sens. Actuators B*, 2018, **260**, 264–273.
- 4 R. Dalapatia, S.N. Balajib, V. Trivedib, L. Khamaria and S. Biswasa, *Sens. Actuators B*, 2017, **245**, 1039–1049.
- 5 S. Chen, P. Hou and X.Z. Song, *Sens. Actuators B*, 2015, **221**, 951–955.



- 6 Y. Jiang, Q. Wu and X.J. Chang, *Talanta*, 2014, **121**, 122–126.
- 7 L.Y. Wang, X.G. Chen and D.R. Cao, *New J. Chem.*, 2017, **41**, 3367–3373.
- 8 Y. Ma, H. Su, X. Kuang, X.Y. Li, T.T. Zhang and B. Tang, *Anal. Chem.*, 2014, **86**, 11459–11463.
- 9 Z.J. Hai, Y.J. Bao, Q.Q. Miao, X.Y. Yi and G.L. Liang, *Anal. Chem.*, 2015, **87**, 2678–2684.
- 10 G.J. Mao, T.T. Wei, X.X. Wang, S.Y. Huan, D.Q. Lu, J. Zhang, X.B. Zhang, W.H. Tan, G.L. Shen and R.Q. Yu, *Anal. Chem.*, 2013, **85**, 7875–7881.
